# Supplementary material
Source: PubMed Central journal article supplement (PMC4895684)
Supplement: JVIM-29-1603-s001.pdf [file JVIM-29-1603-s001.pdf]

**Table S1:** Summary of diagnostic testing undertaken to exclude primary causes of IMHA in the study population. Abbreviations: PCR: polymerase chain reaction; MRI: magnetic resonance imaging; CSF: cerebrospinal fluid; FNA: fine-needle aspirate; PFK: phosphofructokinase; ACTH: adrenocorticotrophic hormone.

| Diagnostic test                           | n   | % population |
|-------------------------------------------|-----|--------------|
| Abdominal ultrasound                      | 269 | 97.1         |
| Thoracic radiography                      | 258 | 93.1         |
| Tick-borne disease PCR testing            | 137 | 49.5         |
| Urine culture                             | 131 | 47.3         |
| Abdominal radiography                     | 110 | 39.7         |
| Splenic fine needle aspirates             | 25  | 9.0          |
| Hepatic fine needle aspirates             | 19  | 6.9          |
| Lymph node aspirates                      | 19  | 6.9          |
| Canine pancreatic lipase immunoreactivity | 12  | 4.3          |
| Bone marrow aspirate and core biopsy      | 11  | 4.0          |
| Additional infectious disease testing     | 8   | 2.9          |
| Fecal parasitology examination or culture | 8   | 2.9          |
| Anti-nuclear antibody testing             | 7   | 2.5          |
| Computed tomography (any)                 | 7   | 2.5          |
| Echocardiography                          | 7   | 2.5          |
| Brain MRI and CSF sampling                | 4   | 1.4          |
| Abdominocentesis and fluid analysis       | 3   | 1.1          |
| FNA of other mass lesions                 | 3   | 1.1          |
| Serum protein electrophoresis             | 3   | 1.1          |
| PFK DNA testing                           | 2   | 0.7          |
| ACTH-stimulation test                     | 1   | 0.4          |
| Arterial blood gas analysis               | 1   | 0.4          |
| Blood cultures                            | 1   | 0.4          |
| Basal cortisol                            | 1   | 0.4          |
| Laparotomy                                | 1   | 0.4          |
| Total iron binding capacity               | 1   | 0.4          |
| Thoracolumbar spine radiographs           | 1   | 0.4          |
| Urinalysis without culture                | 1   | 0.4          |
| Urine protein:creatinine ratio            | 1   | 0.4          |
| Serum zinc and lead levels                | 1   | 0.4          |
